# Supplementary material for: Uniportal video-assisted thoracic surgery basal segmentectomy: a single-center retrospective cohort study
Source: PubMed Central journal article supplement — Transl Lung Cancer Res. 2022 Oct;11(10):2125–35. doi: 10.21037/tlcr-22-651 (PMC9641035; doi:10.21037/tlcr-22-651), 2022-10
Supplement: tlcr-11-10-2125-dss.pdf [file tlcr-11-10-2125-dss.pdf]

## Data Sharing Statement

|                     |                                                                                                                                                     |                                                                                                                                 |
|---------------------|-----------------------------------------------------------------------------------------------------------------------------------------------------|---------------------------------------------------------------------------------------------------------------------------------|
| <b>Article Info</b> | <a href="https://dx.doi.org/10.21037/tlcr-22-651">https://dx.doi.org/10.21037/tlcr-22-651</a>                                                       |                                                                                                                                 |
| <b>Item</b>         | <b>Question</b>                                                                                                                                     | <b>Authors' Response<br/>(place "-" if not applicable)</b>                                                                      |
| 1                   | Would you like to share data collected for your study to others?                                                                                    | Yes.                                                                                                                            |
| 2                   | If not, would you like to share the reason for your decision?                                                                                       | -                                                                                                                               |
| 3                   | What data in particular will be shared?                                                                                                             | All the data.                                                                                                                   |
| 4                   | Any other documents will be shared? Such as study protocol, statistical analysis plan, informed consent form, clinical study report, analytic code. | Statistical analysis plan, clinical study report will also be shared if requested.                                              |
| 5                   | When will data availability begin?                                                                                                                  | From the publication date.                                                                                                      |
| 6                   | When will data availability end?                                                                                                                    | Two years within the publication date, since the technique or survival data may be updated over time.                           |
| 7                   | To whom will you share the data?                                                                                                                    | Thoracic surgeon.                                                                                                               |
| 8                   | For what type of analysis or purpose?                                                                                                               | For analysis to evaluate the surgical techniques.                                                                               |
| 9                   | How or where can the data/documents be obtained?                                                                                                    | Emails could be sent to the address below to obtain the shared data: <a href="mailto:1959884891@qq.com">1959884891@qq.com</a> . |
| 10                  | Any other restrictions?                                                                                                                             | -                                                                                                                               |
